# Supplementary figures and images for: Quantitative proteomic analysis of chicken serum reveals key proteins affecting follicle development during reproductive phase transitions
Source: PubMed Central journal article supplement — Poult Sci. 2020 Oct 8;100(1):325–33. doi: 10.1016/j.psj.2020.09.058 (PMC7772657; doi:10.1016/j.psj.2020.09.058), 2020-10-08

Scores Plot

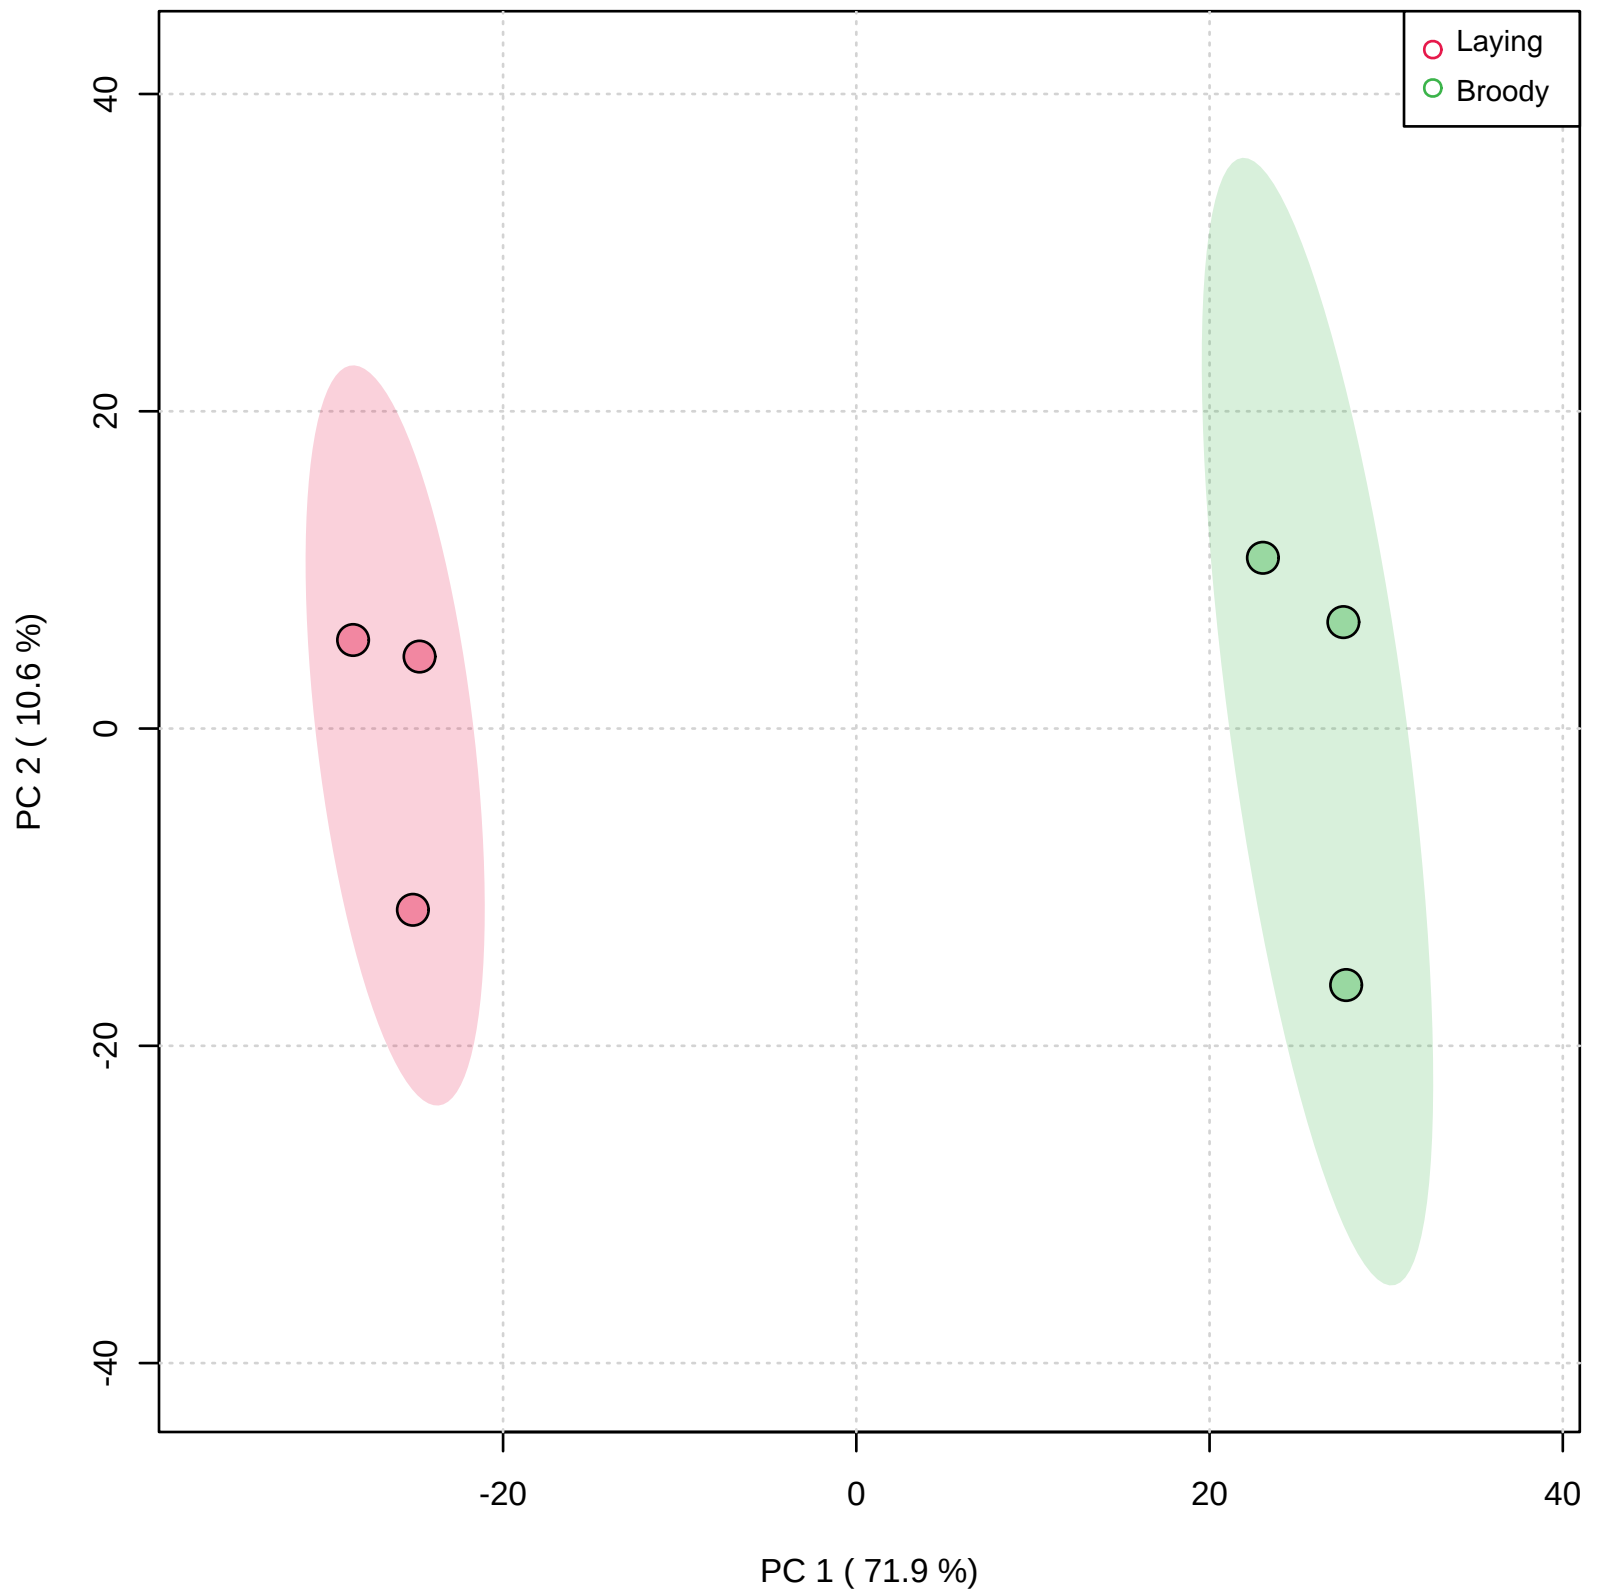

Supplement: mmc4.pdf [file mmc4.pdf]
